# Supplementary material for: Identification of Key Pathways and Genes Related to the Development of Hair Follicle Cycle in Cashmere Goats
Source: MDPI journal article supplement (doi:10.3390/genes12020180), 2021-01-27

**A****Gene significance across modules, p-value=1.7e-198**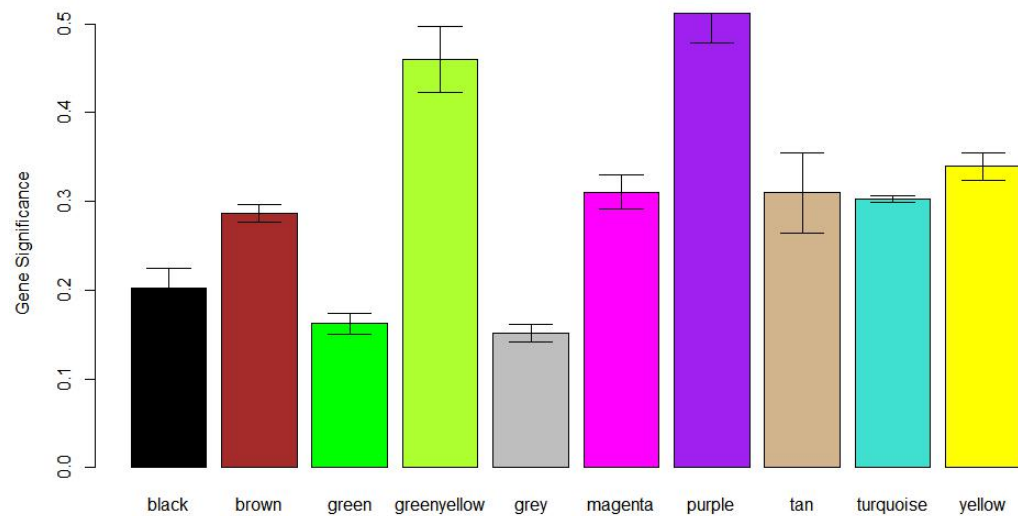**B****Gene significance across modules, p-value=0**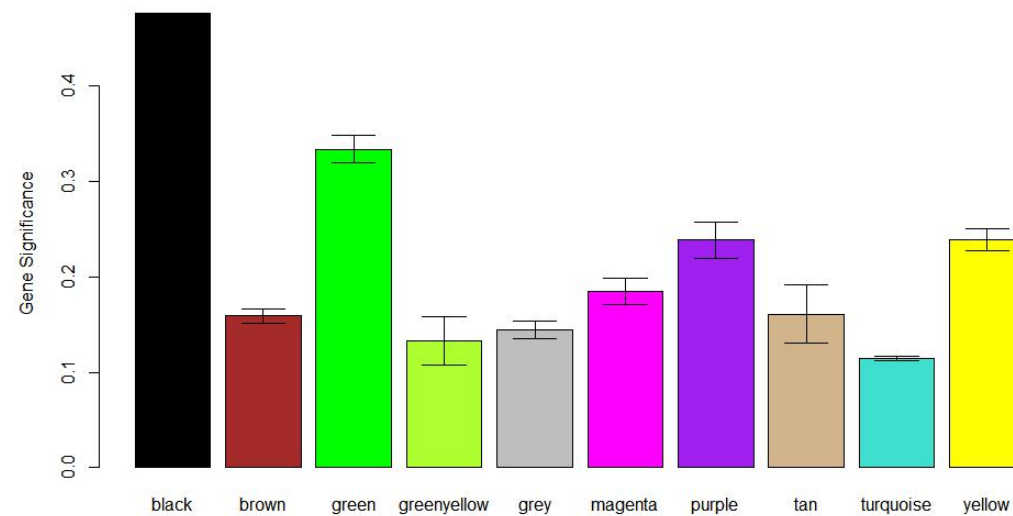**C****Gene significance across modules, p-value=8.9e-103**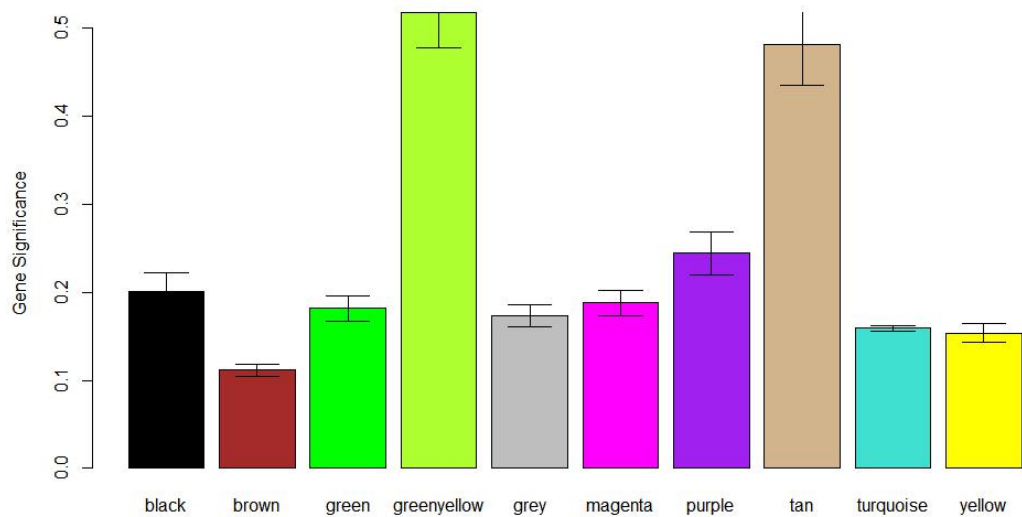**D****Gene significance across modules, p-value=0**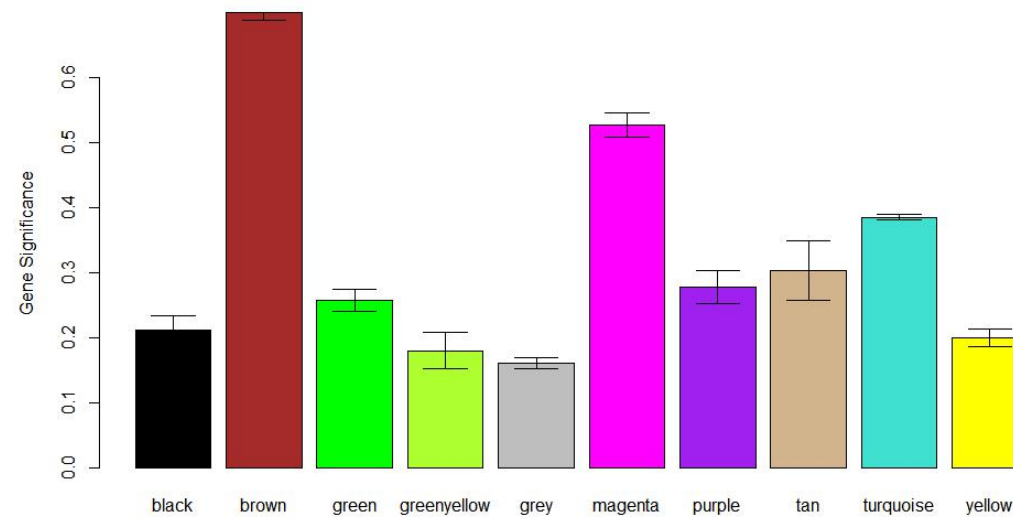

Supplement: s1 [file s1]
