# Supplementary figures and images for: Identification of Key Pathways and Genes Related to the Development of Hair Follicle Cycle in Cashmere Goats
Source: MDPI journal article supplement (doi:10.3390/genes12020180), 2021-01-27

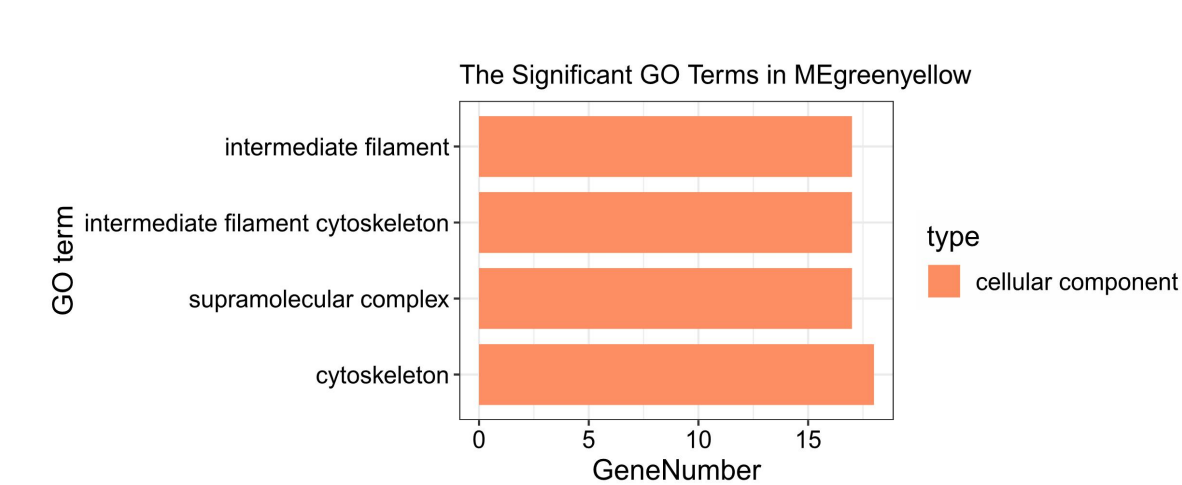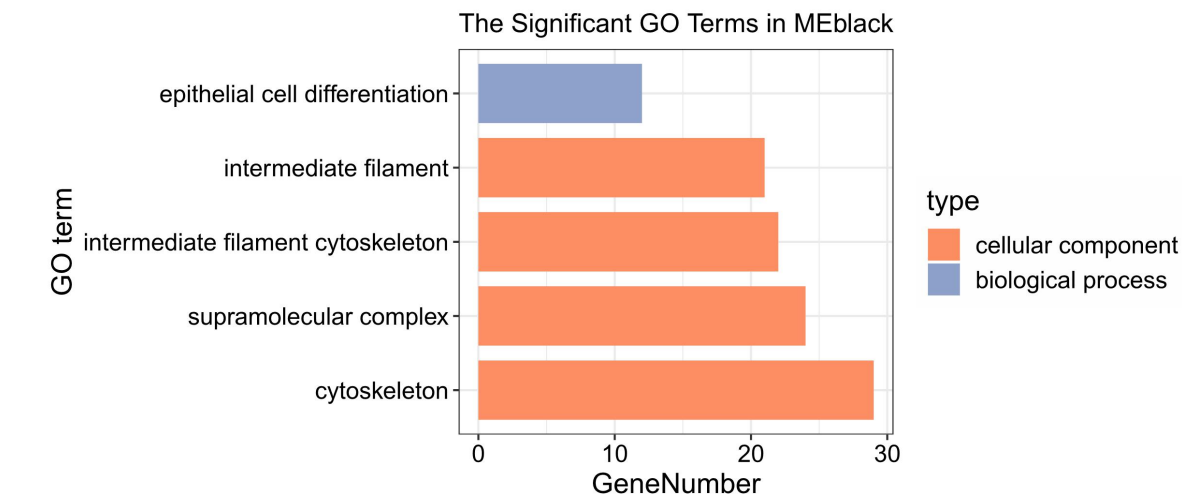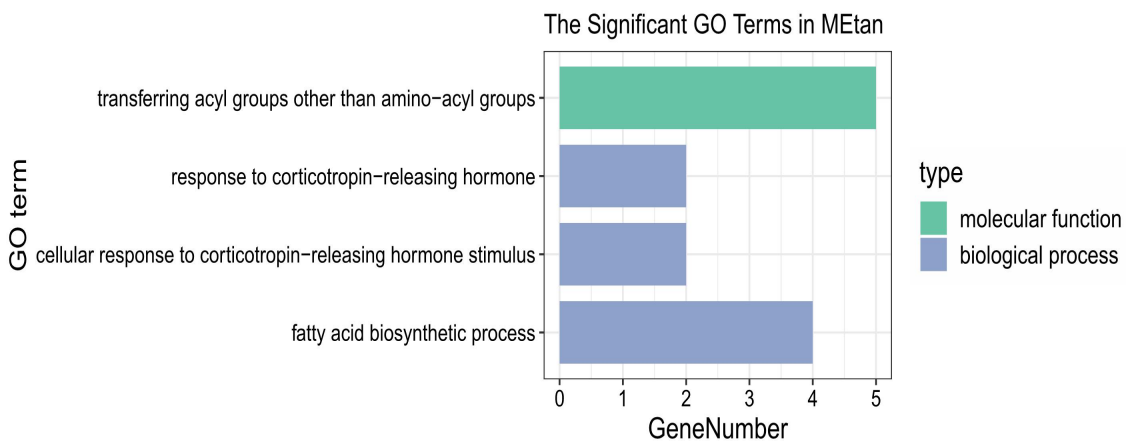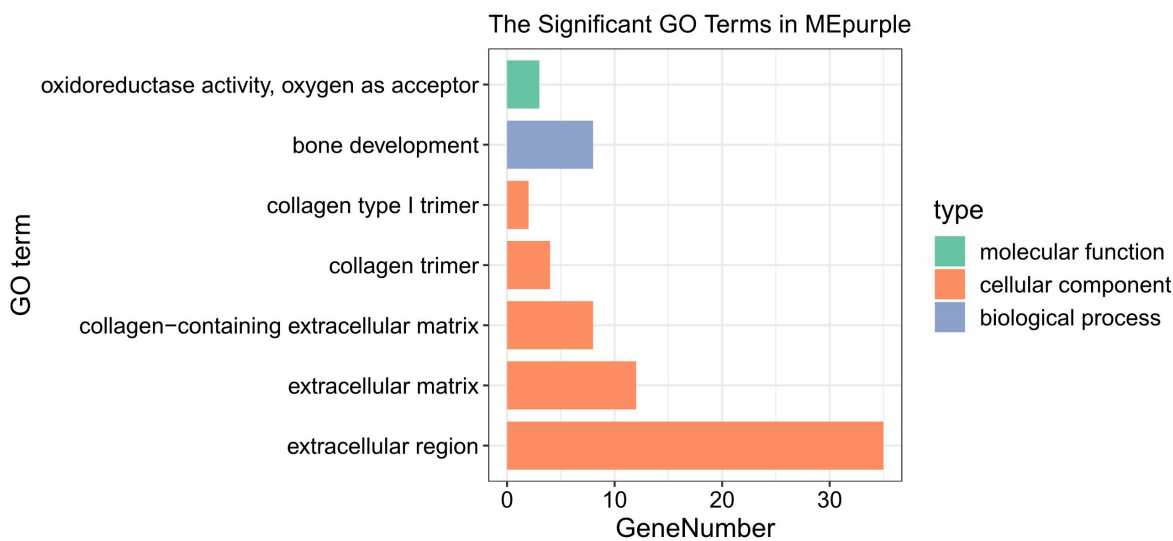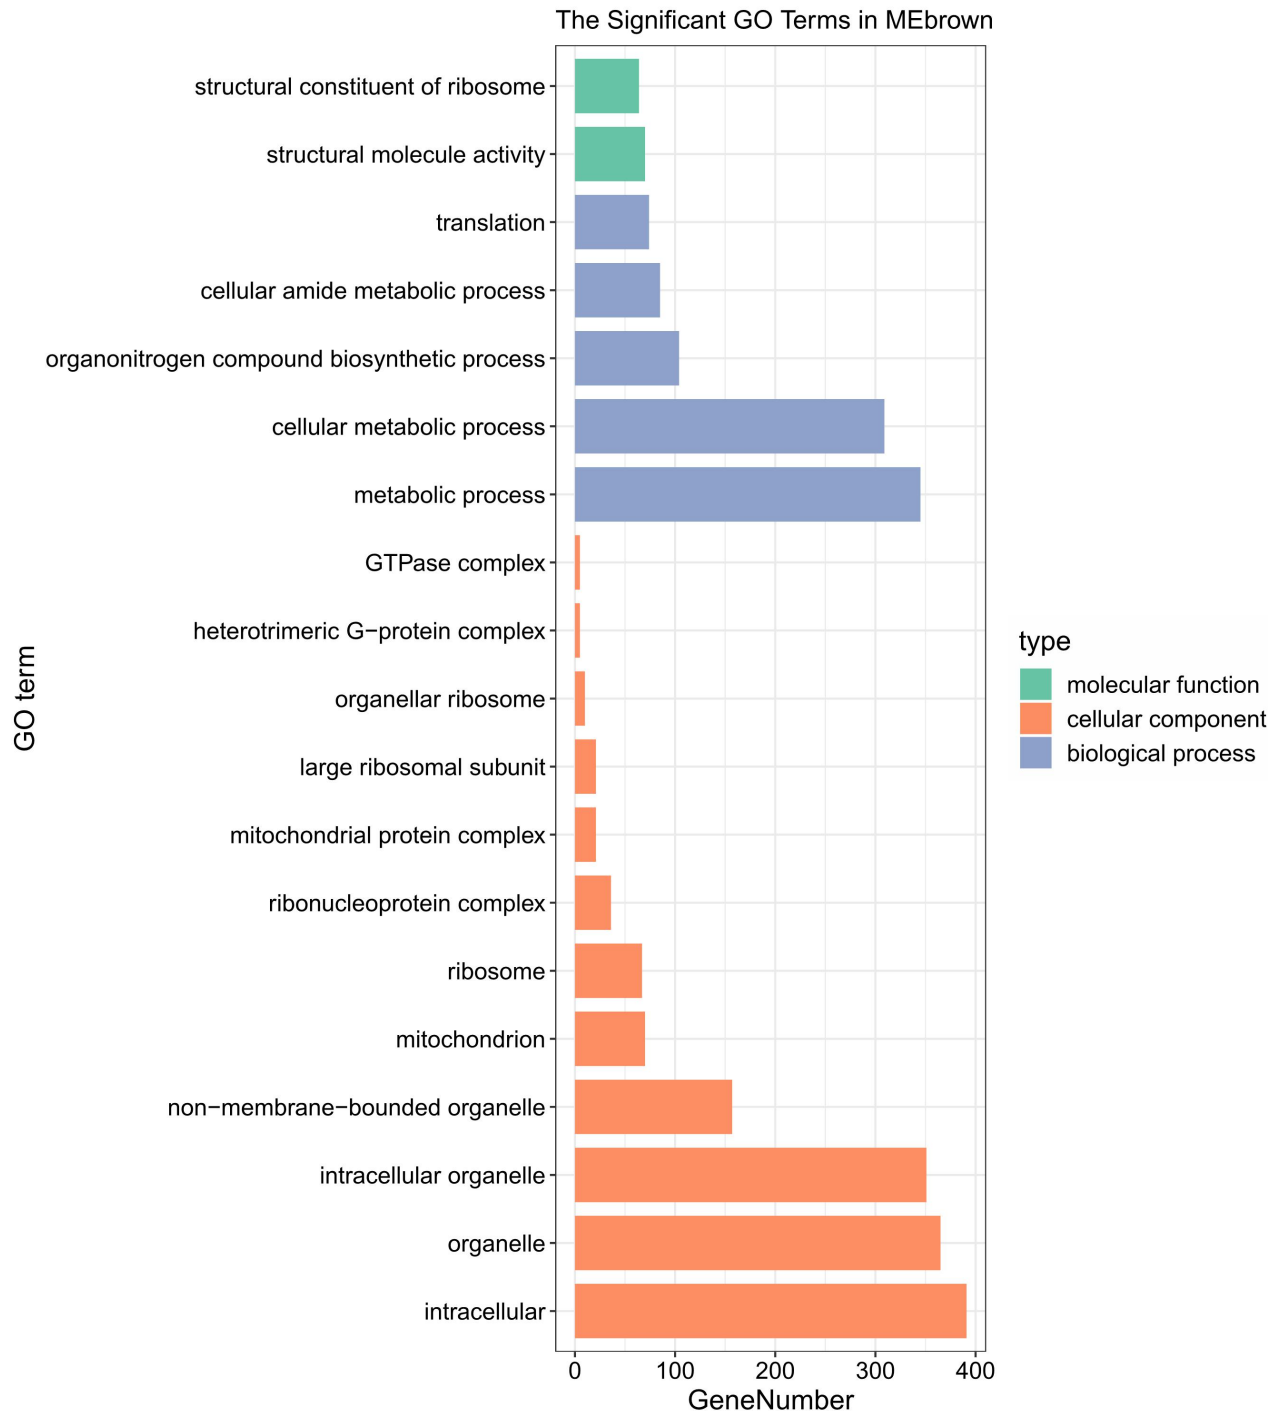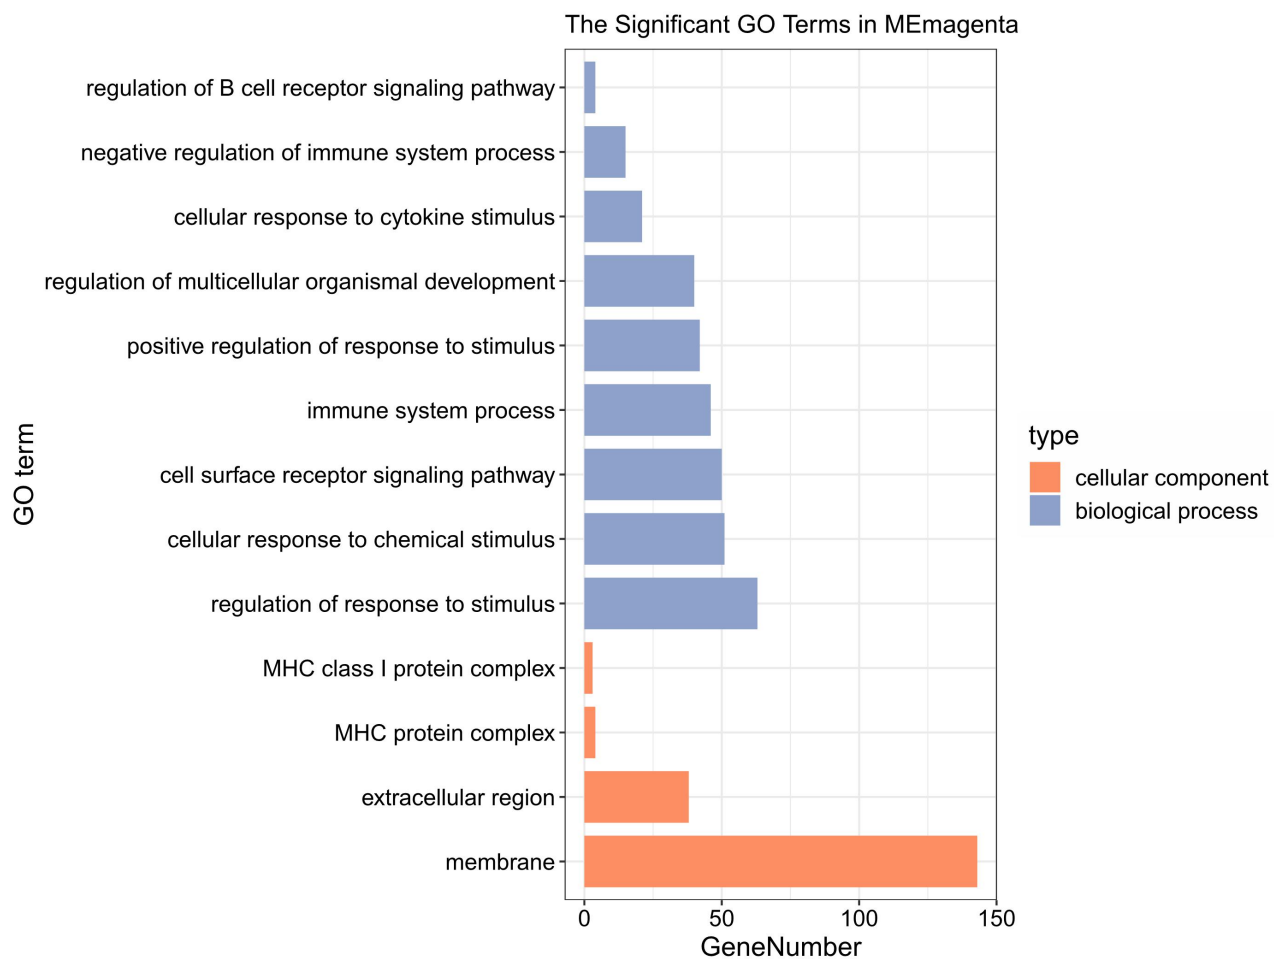

Supplement: s1 [file s1]

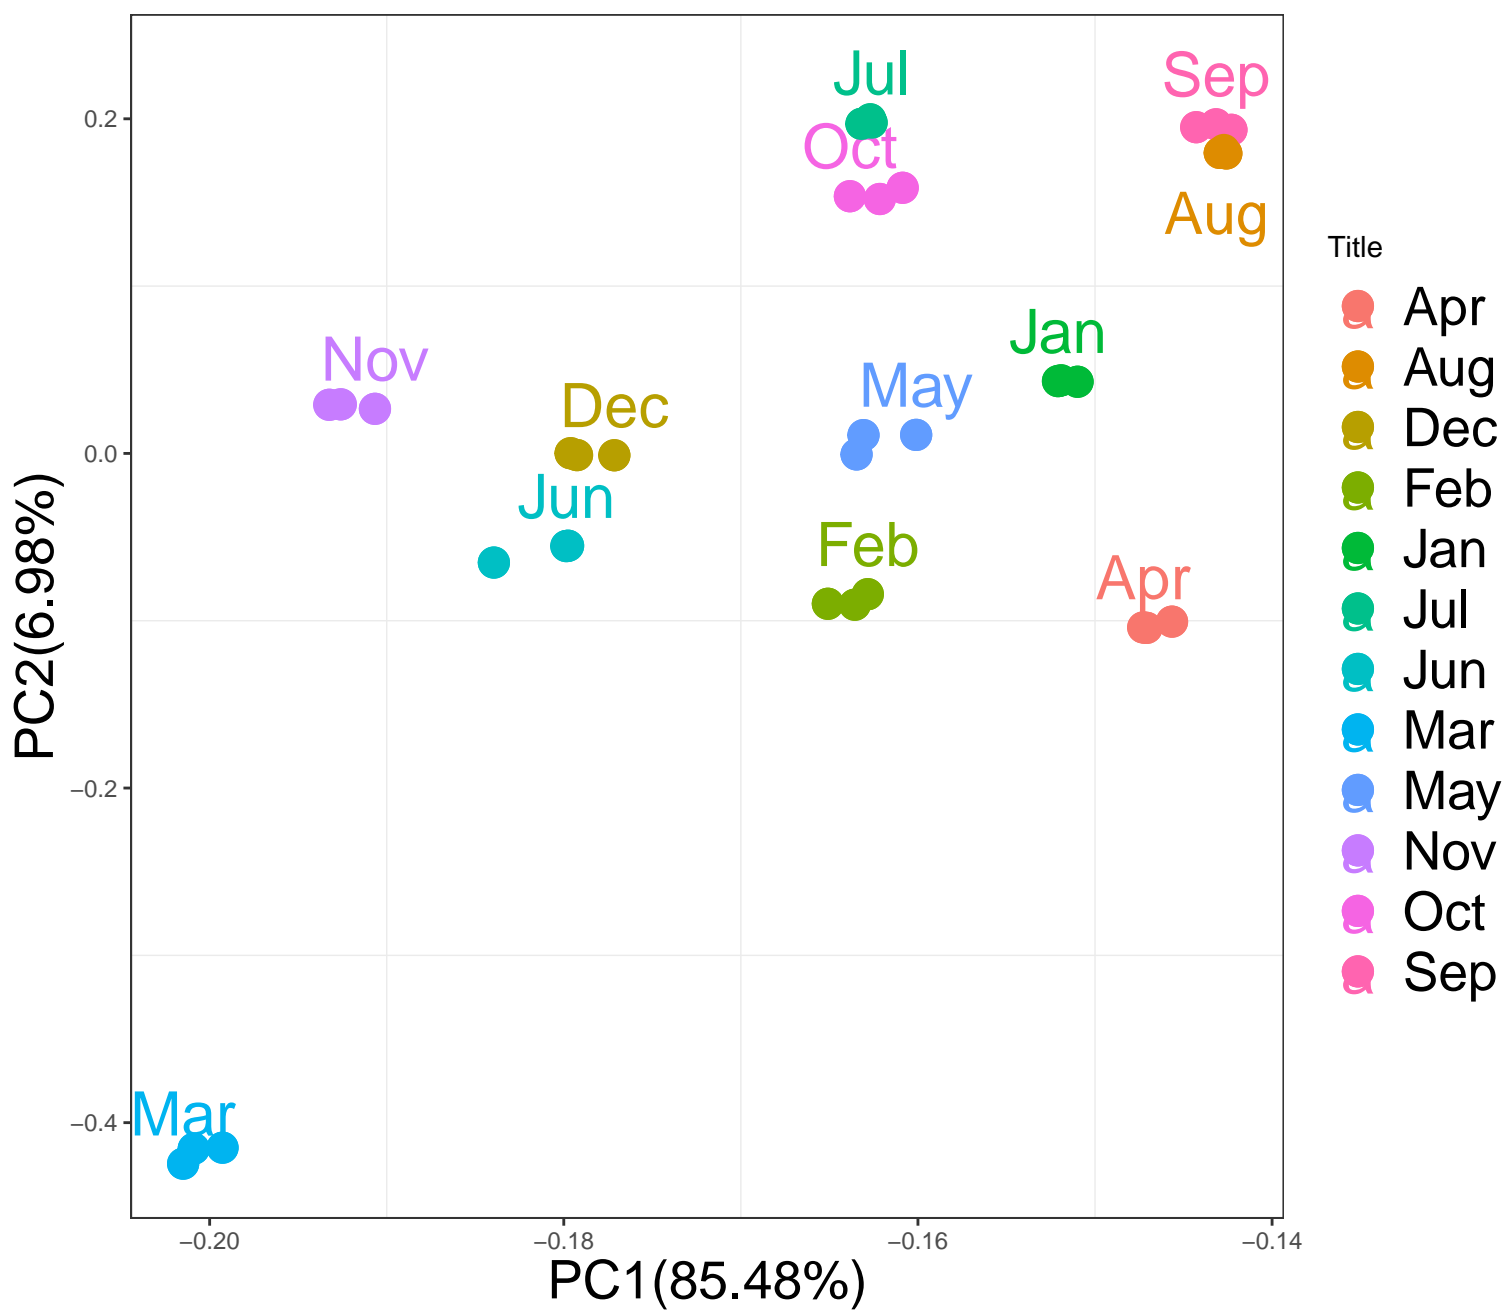

Supplement: s1 [file s1]
